# Supplementary material
Source: publisher figshare collection journal article supplement (https://osapublishing.figshare.com/ndownloader/files/14079854)
Supplement: Supplementary file 1 [file 14079854]

Wavelength£¨nm£©	n	k
300	1.837	2.606
305	1.900	2.633
310	1.962	2.657
315	2.025	2.679
320	2.088	2.699
325	2.151	2.716
330	2.214	2.731
335	2.276	2.743
340	2.337	2.753
345	2.398	2.761
350	2.458	2.767
355	2.517	2.771
360	2.575	2.772
365	2.632	2.772
370	2.688	2.771
375	2.742	2.768
380	2.796	2.763
385	2.847	2.757
390	2.898	2.750
395	2.947	2.742
400	2.995	2.733
405	3.042	2.724
410	3.088	2.713
415	3.132	2.702
420	3.175	2.691
425	3.216	2.679
430	3.257	2.666
435	3.297	2.654
440	3.336	2.641
445	3.373	2.628
450	3.410	2.614
455	3.446	2.601
460	3.482	2.587
465	3.517	2.574
470	3.551	2.560
475	3.584	2.546
480	3.617	2.532
485	3.650	2.517
490	3.682	2.503
495	3.713	2.488
500	3.745	2.473
505	3.775	2.458
510	3.806	2.443
515	3.836	2.427
520	3.865	2.411
525	3.895	2.395
530	3.923	2.378
535	3.952	2.361
540	3.979	2.343
545	4.007	2.326
550	4.034	2.307
555	4.060	2.289
560	4.086	2.270
565	4.111	2.250
570	4.135	2.231
575	4.159	2.210
580	4.182	2.190
585	4.205	2.169
590	4.227	2.148
595	4.248	2.127
600	4.268	2.106
605	4.288	2.084
610	4.307	2.063
615	4.325	2.041
620	4.343	2.019
625	4.360	1.997
630	4.376	1.975
635	4.391	1.953
640	4.406	1.931
645	4.420	1.910
650	4.433	1.888
655	4.446	1.866
660	4.458	1.845
665	4.469	1.824
670	4.480	1.803
675	4.490	1.782
680	4.500	1.761
685	4.509	1.741
690	4.518	1.721
695	4.526	1.701
700	4.533	1.681
705	4.541	1.662
710	4.548	1.643
715	4.554	1.624
720	4.560	1.605
725	4.565	1.587
730	4.571	1.569
735	4.576	1.552
740	4.580	1.534
745	4.584	1.517
750	4.588	1.500
755	4.592	1.484
760	4.596	1.468
765	4.599	1.452
770	4.602	1.436
775	4.605	1.421
780	4.607	1.406
785	4.609	1.391
790	4.612	1.377
795	4.614	1.362
800	4.615	1.348
